# Supplementary material for: The Potential of Gamification for Social Sustainability: Meaning and Purposes in Agri-Food Industry
Source: MDPI journal article supplement (doi:10.3390/su15129503), 2023-06-13
Supplement: s1 [file s1]

Archive with 1 entries (1 files):
- sustainability-2386308-supplementary.pdf
